# Supplementary material
Source: PubMed Central journal article supplement (PMC6251583)

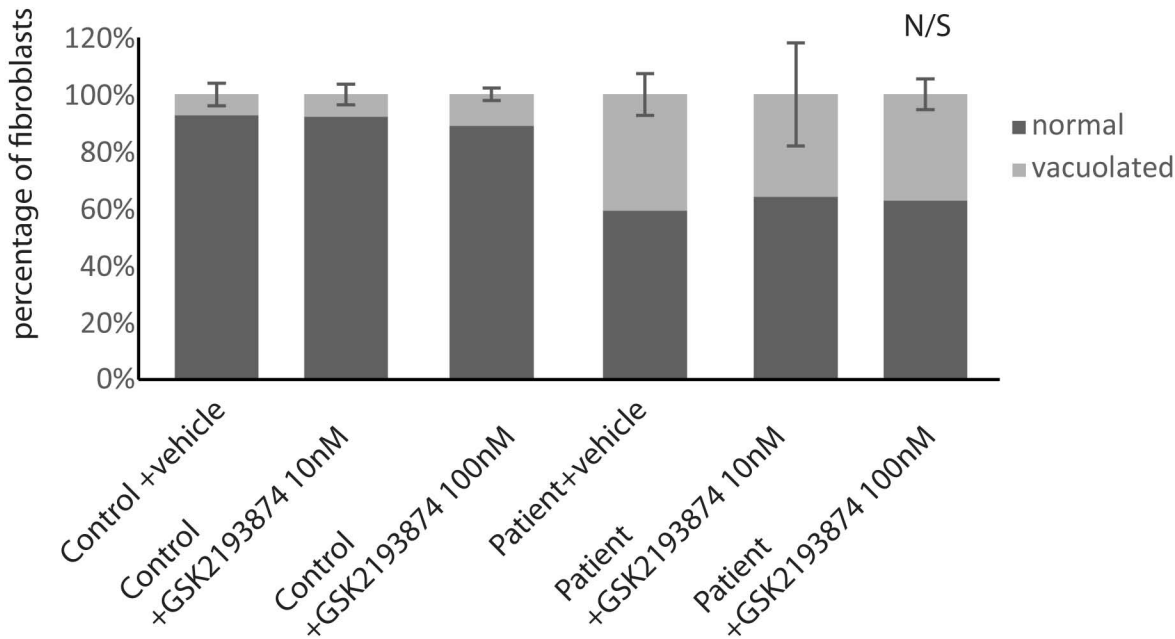

Supplement: nlx062_SuppFig1.pdf [file nlx062_SuppFig1.pdf]

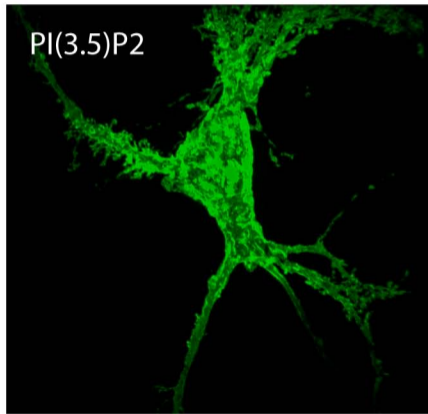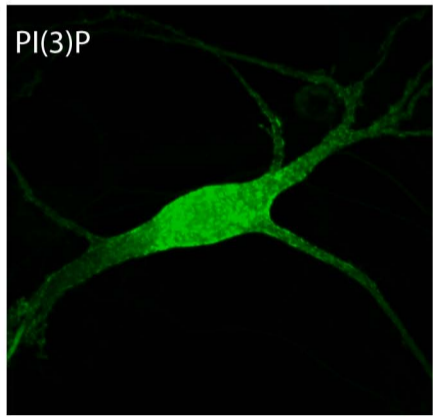

Supplement: nlx062_SuppFig2.pdf [file nlx062_SuppFig2.pdf]
